# Supplementary material for: Hospital and Community Correlates of Recommended Emergency Department Mental Health Care for Patients Presenting With Self-Harm
Source: Atypon-hosted journal article supplement (doi:10.1176/appi.ps.202000779), 2021-07-08
Supplement: appi.ps.202000779.ds001.pdf [file appi.ps.202000779.ds001.pdf]

Table 2. Community characteristics for emergency departments that did and did not routinely provide evidence-based self-harm management practices

|                                                                          | Routinely schedules follow-up outpatient appointment |             |         | Routinely conducts assessments |      |         |                 |      |        | Routinely conducts safety planning elements |                          |         |
|--------------------------------------------------------------------------|------------------------------------------------------|-------------|---------|--------------------------------|------|---------|-----------------|------|--------|---------------------------------------------|--------------------------|---------|
|                                                                          | Yes<br>N=198                                         | No<br>N=296 | p-value | Current and past SI or plans   |      |         | Access to means |      |        | Completes<br>≥4<br>N=149                    | Completes<br><4<br>N=345 | p-value |
|                                                                          | Yes                                                  | No          |         | Yes                            | No   | p-value | Yes             | No   |        |                                             |                          |         |
| <b>Community Characteristics</b>                                         |                                                      |             |         |                                |      |         |                 |      |        |                                             |                          |         |
| HPSA – Mental Health                                                     |                                                      |             | 0.140   |                                |      | 0.3765  |                 |      | 0.697  |                                             |                          | 0.074   |
| Whole county                                                             | 35.8                                                 | 27.5        |         | 32.2                           | 26.9 |         | 31.6            | 29.5 |        | 38.6                                        | 27.6                     |         |
| None or part of county                                                   | 64.2                                                 | 72.5        |         | 67.8                           | 73.1 |         | 68.4            | 70.5 |        | 61.4                                        | 72.4                     |         |
| Staffing availability – Psychiatry, Total Pt care per 100,000 population |                                                      |             | 0.299   |                                |      | 0.7199  |                 |      | 0.935  |                                             |                          | 0.947   |
| ≤5                                                                       | 41.5                                                 | 41.9        |         | 40.9                           | 44.2 |         | 41.3            | 42.5 |        | 43.1                                        | 41.2                     |         |
| 6-17                                                                     | 37.6                                                 | 43.8        |         | 41.3                           | 41.5 |         | 41.2            | 41.7 |        | 40.8                                        | 41.6                     |         |
| ≥18                                                                      | 20.9                                                 | 14.3        |         | 17.8                           | 14.3 |         | 17.5            | 15.9 |        | 16.1                                        | 17.2                     |         |
| Patient population – % White                                             |                                                      |             | 0.849   |                                |      | 0.7840  |                 |      | 0.635  |                                             |                          | 0.570   |
| ≤70.1                                                                    | 26.8                                                 | 29.6        |         | 28.0                           | 30.0 |         | 30.1            | 26.0 |        | 31.6                                        | 27.3                     |         |
| 70.2-85                                                                  | 30.5                                                 | 28.6        |         | 30.4                           | 26.6 |         | 29.8            | 28.7 |        | 25.5                                        | 30.9                     |         |
| ≥85.1                                                                    | 42.7                                                 | 41.8        |         | 41.6                           | 43.4 |         | 40.1            | 45.3 |        | 42.9                                        | 41.8                     |         |
| Patient population – % Poverty                                           |                                                      |             | 0.244   |                                |      | 0.7337  |                 |      | 0.858  |                                             |                          | 0.255   |
| ≤11.5                                                                    | 38.6                                                 | 30.9        |         | 34.1                           | 33.2 |         | 34.7            | 32.7 |        | 35.1                                        | 33.4                     |         |
| 11.6-15.7                                                                | 29.1                                                 | 37.8        |         | 35.3                           | 31.8 |         | 33.2            | 36.3 |        | 27.9                                        | 37.0                     |         |
| ≥15.8                                                                    | 32.3                                                 | 31.4        |         | 30.5                           | 35.0 |         | 32.1            | 31.0 |        | 37.0                                        | 29.6                     |         |
| 3-Yr Suicide rate per 100,000 population <sup>a</sup>                    |                                                      |             | 0.922   |                                |      | 0.010*  |                 |      | 0.010* |                                             |                          | 0.667   |
| ≤11                                                                      | 28.0                                                 | 26.0        |         | 21.2                           | 42.4 |         | 20.6            | 36.9 |        | 23.0                                        | 28.4                     |         |
| 12-15                                                                    | 36.5                                                 | 36.2        |         | 38.6                           | 30.0 |         | 36.5            | 36.0 |        | 37.4                                        | 35.9                     |         |
| ≥16                                                                      | 35.5                                                 | 37.8        |         | 40.2                           | 27.6 |         | 42.8            | 27.1 |        | 39.7                                        | 35.8                     |         |

<sup>a</sup> Missing, N=78

\*p<.05, \*\*p<.01
